# Supplementary material for: G protein‐coupled estrogen receptor in the rostral ventromedial medulla contributes to the chronification of postoperative pain
Source: PubMed Central journal article supplement (PMC8504531; doi:10.1111/cns.13704), 2021-07-13
Supplement: CNS-27-1313-s007.pdf [file CNS-27-1313-s007.pdf]

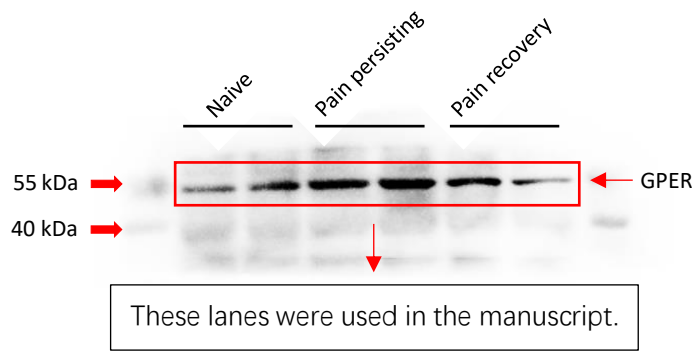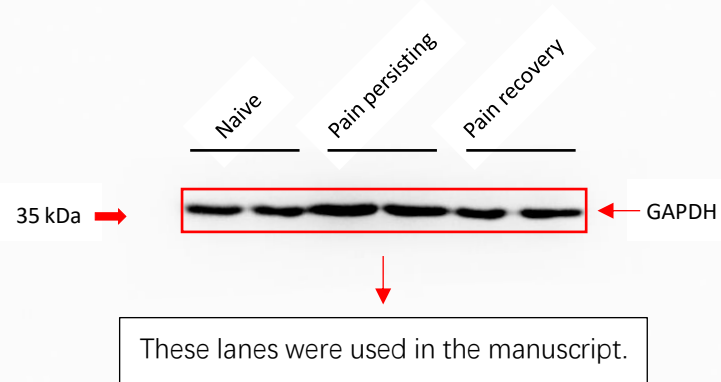

Full unedited blot for Figure 2C

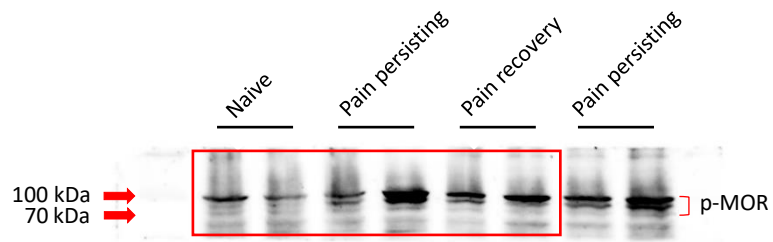

These lanes were used in the manuscript.

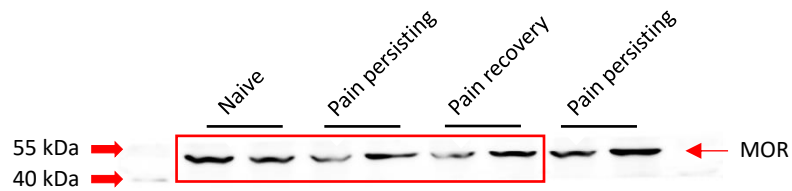

These lanes were used in the manuscript.

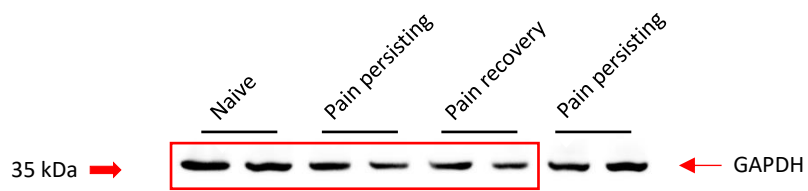

These lanes were used in the manuscript.

Full unedited blot for Figure 4A

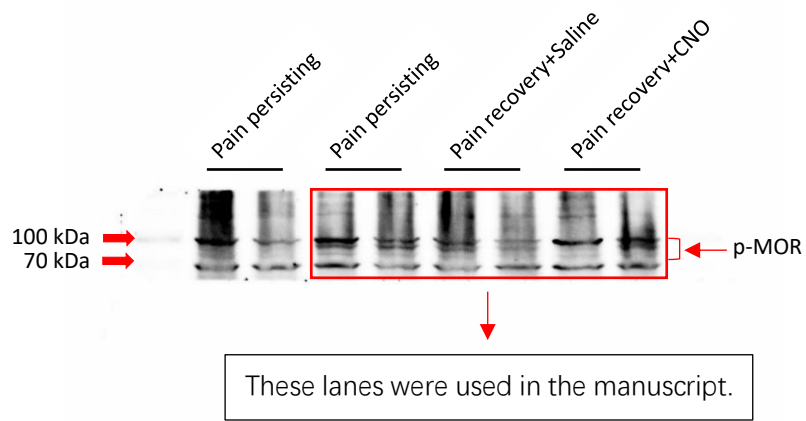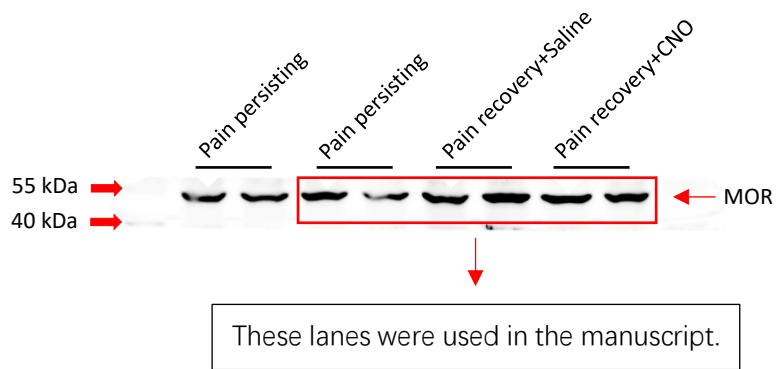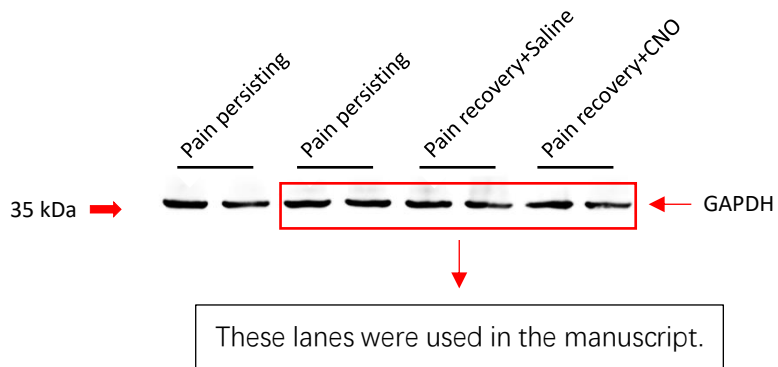

Full unedited blot for Figure 5H
